# Supplementary material
Source: Springer Nature journal article supplement (https://www.springermedizin.de/resource/supplementary/12891_2010_892_MOESM1_ESM.pdf/9506646)
Supplement: MOESM1 [file 9506646]

Assessed for eligibility 978 conscripts (1st cohort 359  
and 2nd cohort 619 conscripts)

Refused to participate (18 conscripts)

Excluded 16 conscripts  
(8 women, 6 discharged during  
first two weeks, 1 postponement  
of service, 1 missing patient record)

6 companies; 944 conscripts

Follow-up for 180 days  
Exposures and injuries were reported for  
July 10, 2006 through January 5, 2007 (1st cohort)  
January 8, 2007 through July 6, 2007 (2nd cohort)
